# Supplementary material
Source: PubMed Central journal article supplement (PMC3237938)
Supplement: NIHMS337273-supplement-1_si_001.pdf [file NIHMS337273-supplement-1_si_001.pdf]

# **Radicals formed in N-Acetyl-Proline by Electron Attachment: ESR Spectroscopy and Computational Studies**

*Jeanette F. Kheir,<sup>1</sup> Lidia Chomicz,<sup>2</sup> Janusz Rak,<sup>2</sup> Kit H. Bowen,<sup>3</sup> Michael D. Sevilla<sup>1,\*</sup>*

<sup>1</sup>Department of Chemistry, Oakland University, Rochester, Michigan 48309, USA

<sup>2</sup>Department of Chemistry, University of Gdańsk, 80-952 Gdańsk, Poland

<sup>3</sup>Department of Chemistry, Johns Hopkins University, Baltimore, Maryland 21218, USA

\*To whom correspondence should be addressed. E-mail: [sevilla@oakland.edu](mailto:sevilla@oakland.edu)

**Table S1.** Cartesian coordinates (in Å) for the RAD3 geometry optimized at the B3LYP/6-31++G(d,p) level with the C<sub>carboxyl</sub>-C2-C3-C4 dihedral frozen at 23°.

| atom | x       | y       | z       |
|------|---------|---------|---------|
| C    | -0.0393 | 0.0054  | 0.0107  |
| C    | -0.0217 | -0.0097 | 1.5278  |
| N    | 1.1941  | 0.0032  | 2.1126  |
| C    | 1.3832  | -0.0236 | 3.5599  |
| C    | 2.8147  | 0.3539  | 3.9548  |
| C    | 3.2230  | 1.8126  | 3.6225  |
| C    | 4.1808  | 2.0849  | 2.5120  |
| C    | 4.4798  | 1.2466  | 1.3740  |
| O    | 3.9047  | 0.2015  | 1.0489  |
| O    | -1.0802 | -0.0292 | 2.1829  |
| O    | 5.5065  | 1.7377  | 0.6305  |
| H    | 4.7068  | 3.0347  | 2.5375  |
| H    | 5.6439  | 1.1380  | -0.1231 |
| H    | -0.5560 | -0.8901 | -0.3473 |
| H    | -0.6106 | 0.8744  | -0.3286 |
| H    | 0.9589  | 0.0404  | -0.4320 |
| H    | 2.3150  | 2.4125  | 3.4298  |
| H    | 3.6575  | 2.2810  | 4.5146  |
| H    | 3.5216  | -0.3564 | 3.5163  |
| H    | 2.8817  | 0.2227  | 5.0394  |
| H    | 1.1516  | -1.0239 | 3.9490  |
| H    | 0.6677  | 0.6684  | 4.0175  |
| H    | 2.0341  | -0.0175 | 1.5392  |
